# Supplementary material for: In situ formed N-containing copper nanoparticles: a high-performance catalyst toward carbon monoxide electroreduction to multicarbon products with high faradaic efficiency and current density
Source: Royal Society of Chemistry journal article supplement (doi:10.1039/d2nr01226j), 2022-01-01
Supplement: d2nr01226j1.pdf [file d2nr01226j1.pdf]

## Electronic Supplementary Information

### **In-situ formed N-containing copper nanoparticles: a high-performance catalyst toward carbon monoxide electroreduction to multicarbon products with high Faradaic efficiency and current density**

Huitong Du,<sup>a</sup> Li-Xia Liu,<sup>a</sup> Yanming Cai,<sup>a</sup> Ying Wang,<sup>b</sup> Jian-Rong Zhang,<sup>a</sup> Qianhao Min,<sup>a</sup> and Wenlei Zhu,<sup>a\*</sup>

<sup>a</sup>School of Chemistry and Chemical Engineering, School of the Environment, State Key Laboratory of Analytical Chemistry for Life Science, Nanjing University, Nanjing, 210023, P. R. China

<sup>b</sup>College of Environmental Science and Engineering, Tongji University, Shanghai 200092, P. R. China

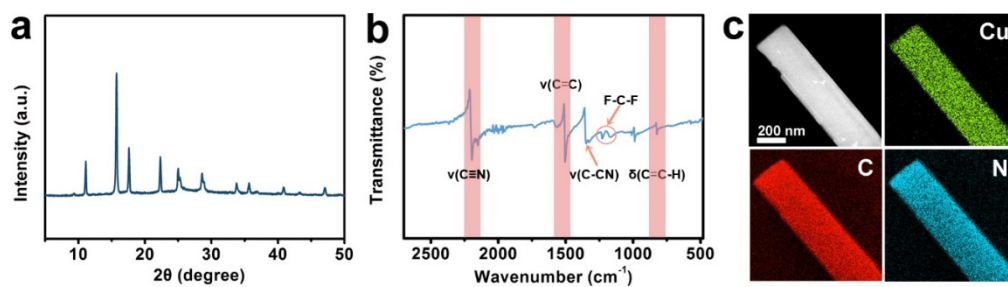

**Fig. S1.** (a) XRD pattern, (b) FTIR spectrum, (c) TEM image and elemental mapping images of the CuTCNQ.

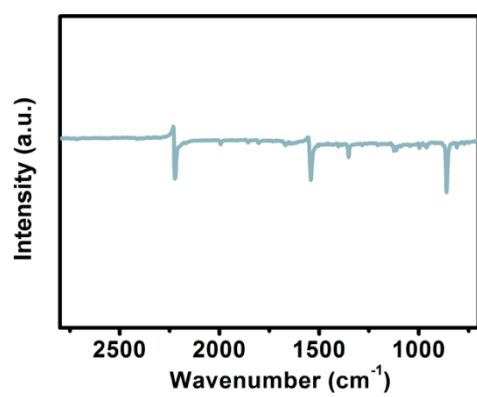

**Fig. S2.** FTIR spectrum of the TCNQ.

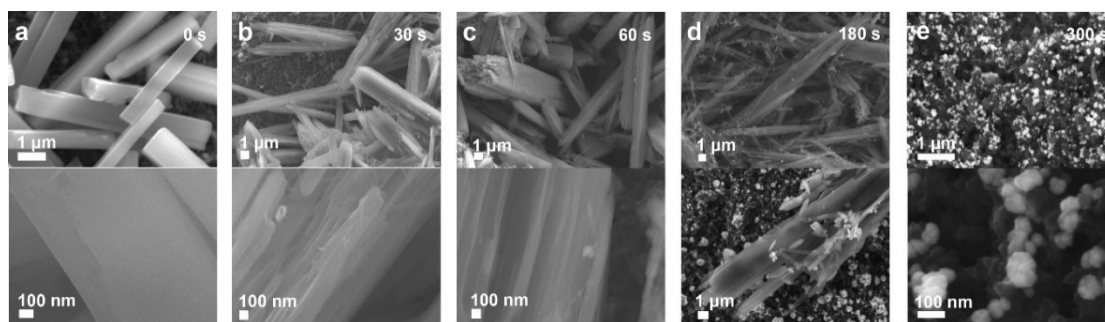

**Fig. S3.** SEM images of CuTCNQ/GDL at different pre-reduction times under a constant current density of  $50 \text{ mA cm}^{-2}$ .

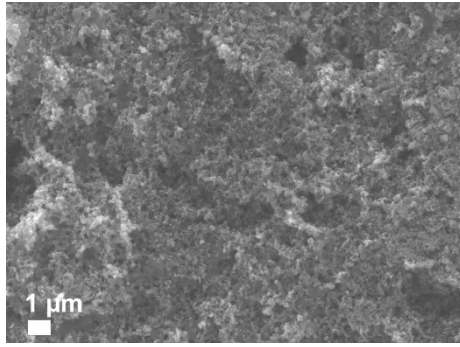

**Fig. S4.** SEM image of the bare GDL.

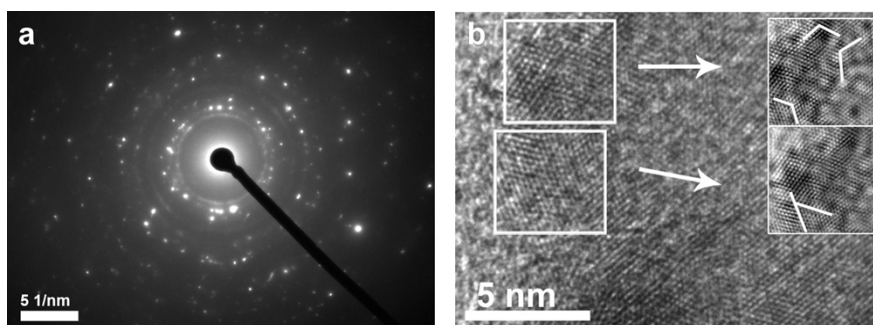

**Fig. S5.** (a) Selected area electron diffraction (SAED) pattern image of the reconstructed N-Cu NPs. (b) HRTEM images of the N-Cu NPs (Insets present the the grain boundary).

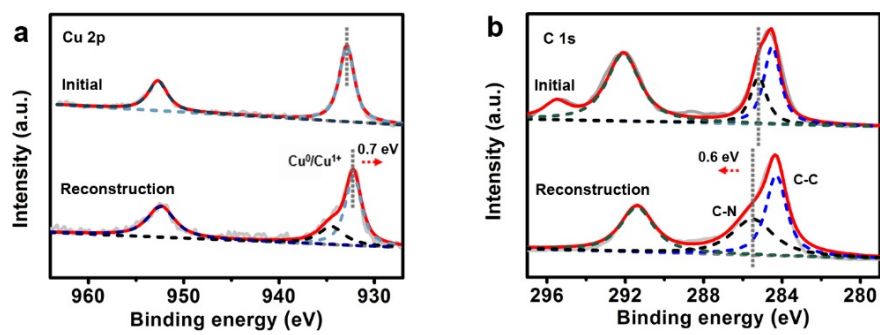

**Fig. S6.** XPS spectrum in the (a) Cu 2p and (b) C1s regions for N-Cu NPs and CuTCNQ.

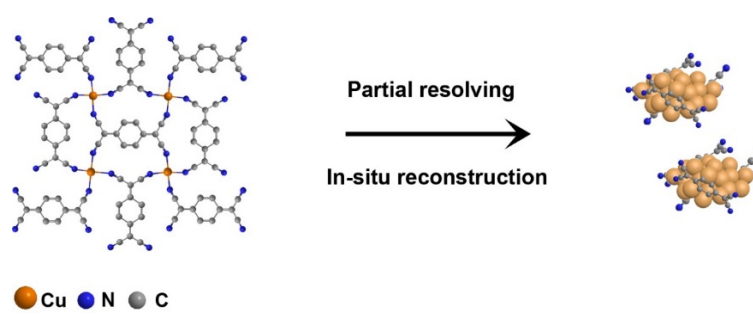

**Fig. S7.** Schematic diagram of the proposed N-Cu NPs evolution.



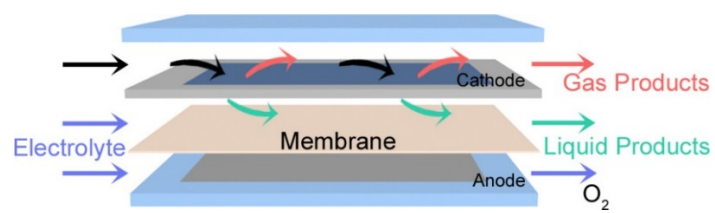

**Fig. S8.** Schematic diagram of the flow cell.

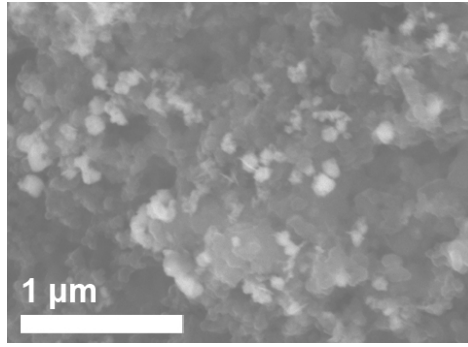

**Fig. S9.** SEM image of N-Cu NPs/GDL after durability test.

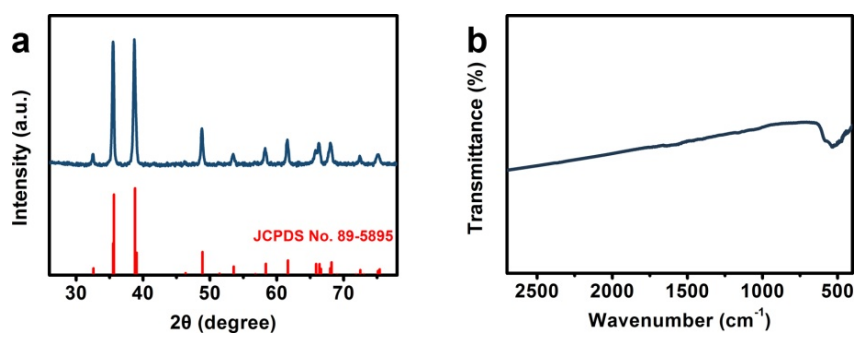

**Fig. S10.** (a) XRD pattern and (b) FTIR spectrum of CuO NPs.

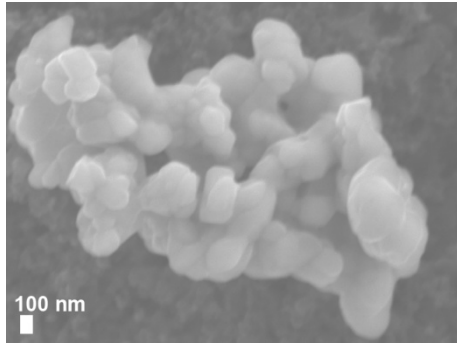

**Fig. S11.** SEM image of CuO NPs/GDL.

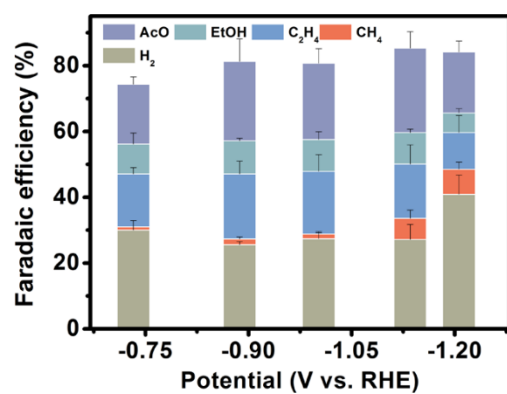

**Fig. S12.** ECOR products distribution of CuO NPs/GDL at each given potential in 1.0 M KOH.

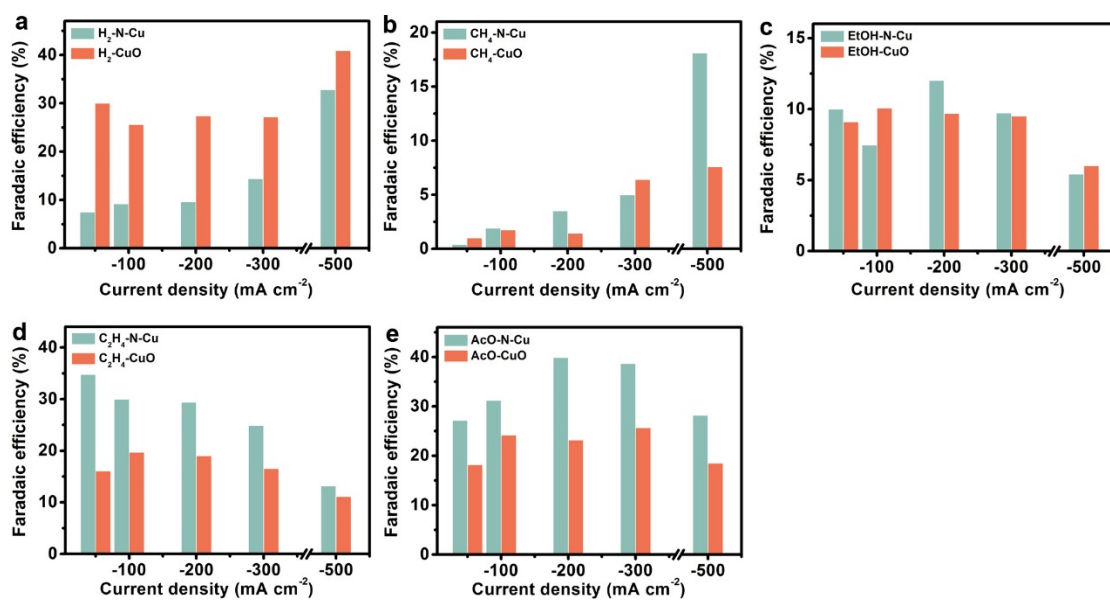

**Fig. S13.** (a) H<sub>2</sub>, (b) CH<sub>4</sub>, (c) EtOH, (d) C<sub>2</sub>H<sub>4</sub> and (e) AcO FEs of N-Cu NPs/GDL and CuO NPs/GDL at each given current density in 1.0 M KOH.

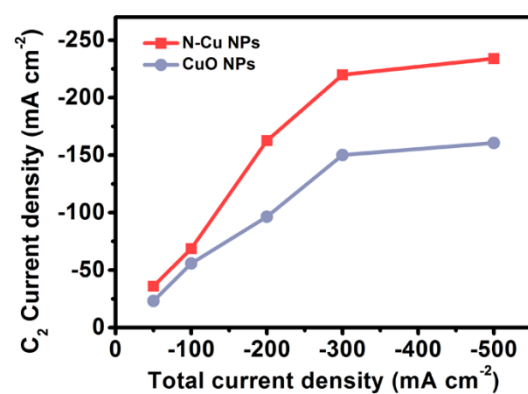

**Fig. S14.** C<sub>2</sub> partial current density for N-Cu NPs/GDL and CuO NPs/GDL at each given total current density in 1.0 M KOH.

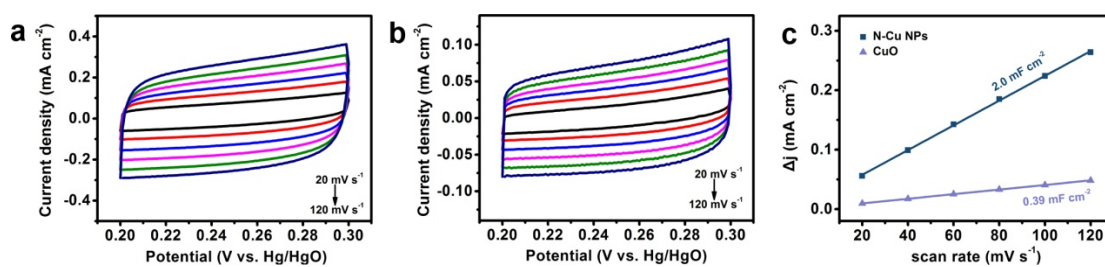

**Fig. S15.** CVs of (a) N-Cu NPs/GDL and (b) CuO NPs/GDL with various scan rates in the range between 0.2 V and 0.3 V, (c) The capacitive currents at 0.25 V as a function of scan rate for N-Cu NPs/GDL and CuO NPs/GDL.

According to the above formula, the calculated ECSA of N-Cu NPs/GDL and CuO NPs/GDL are 68.97 and 13.45  $cm_{ECSA}^2$ , respectively. Additionally, we can determine the RFs of N-Cu NPs/GDL and CuO NPs/GDL are 68.97 and 13.45, respectively.



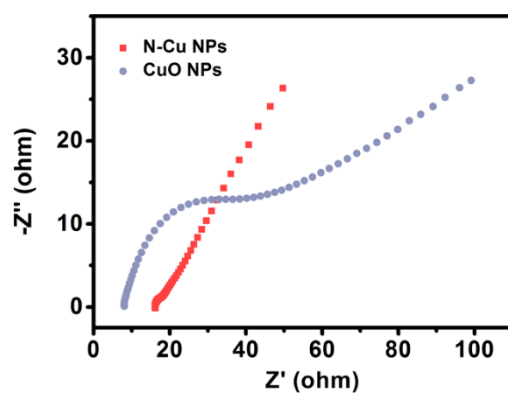

**Fig. S16.** Nyquist plots of N-Cu NPs/GDL and CuO NPs/GDL.

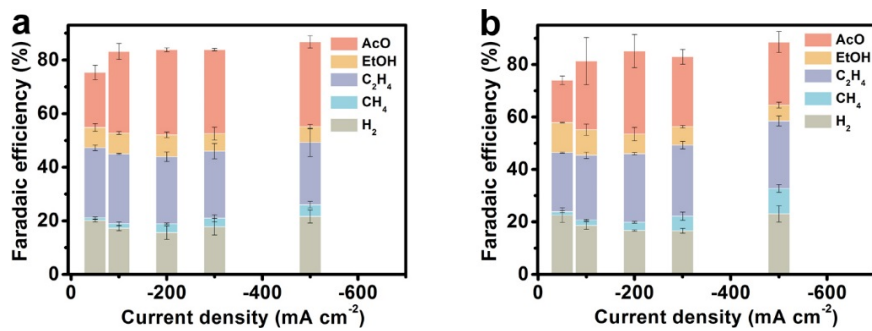

**Fig. S17.** ECOR products distribution of (a) Cu NPs/GDL and (b) CuCl/GDL at each given current density in 1.0 M KOH.

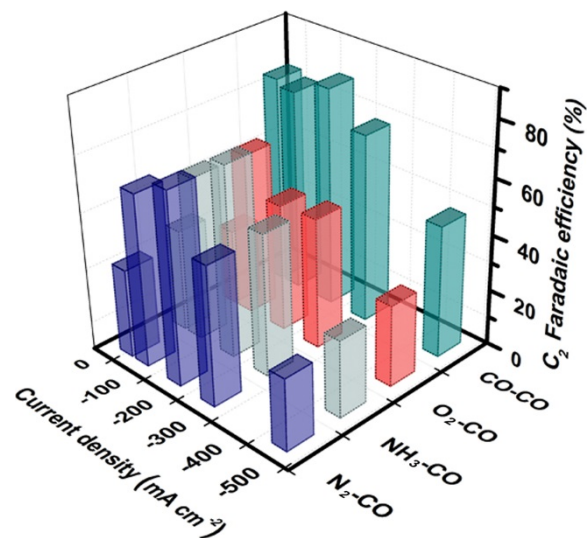

**Fig. S18.** C<sub>2</sub> FE of the N-Cu NPs/GDL at each given current density under different pre-reduction atmospheres. (For example, CO-CO means pre-reduction in a CO atmosphere and then a catalytic test in a CO atmosphere.)

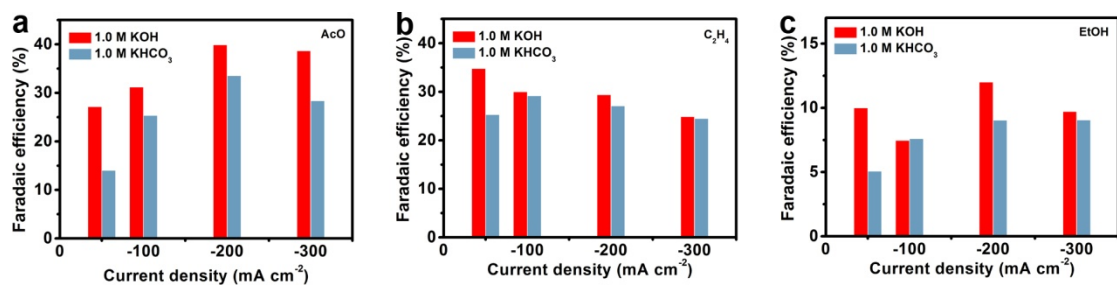

**Fig. S19.** (a) AcO, (b) C<sub>2</sub>H<sub>4</sub> and (c) EtOH FE<sub>s</sub> of the N-Cu NPs/GDL at each given current density in different electrolytes.

**Table S1.** Comparison of the electrocatalytic CO reduction performance for Cu-based catalysts.

| Catalyst                                       | Electrolyte              | C <sub>2+</sub> FE (%) at -0.69 V vs. RHE | C <sub>2+</sub> current density at -0.69 V vs. RHE (mA cm <sup>-2</sup> ) | Maximum C <sub>2+</sub> FE (%) | Potential (V vs. RHE, corresponding to the maximum C <sub>2+</sub> FE ) | C <sub>2+</sub> current density (mA cm <sup>-2</sup> , corresponding to the maximum C <sub>2+</sub> FE ) | Ref.      |
|------------------------------------------------|--------------------------|-------------------------------------------|---------------------------------------------------------------------------|--------------------------------|-------------------------------------------------------------------------|----------------------------------------------------------------------------------------------------------|-----------|
| N-Cu NPs                                       | 1.0 M KOH                | 81.31                                     | 162.62                                                                    | 81.31                          | -0.69                                                                   | 162.62                                                                                                   | This work |
| Polycrystalline Cu                             | 0.1 M KOH                | ~58                                       | ~1.3                                                                      | 65                             | -0.63                                                                   | ~0.9                                                                                                     | 1         |
| Fragmented Cu                                  | 1.0 M KOH                | -                                         | -                                                                         | ~80                            | -0.66                                                                   | ~100                                                                                                     | 2         |
| Spherical Cu                                   | 0.1 M KOH                | ~62                                       | ~5                                                                        | 62                             | -0.78                                                                   | 100                                                                                                      | 3         |
| Dendritic Cu electrodes                        | 0.1 M KOH                | ~60                                       | ~14                                                                       | ~75                            | -0.83                                                                   | ~80                                                                                                      |           |
| Cu nanocavity                                  | 1.0 M KOH                | ~63                                       | ~40                                                                       | 68.7                           | -0.36                                                                   | ~10                                                                                                      | 4         |
| Cu nanosheets                                  | 2.0 M KOH                | ~62                                       | ~62                                                                       | 70                             | -0.74                                                                   | ~155                                                                                                     | 5         |
| Cu nanowires                                   | 0.1 M KOH                | -                                         | -                                                                         | 65                             | -0.30                                                                   | 0.22                                                                                                     | 6         |
| OD-Cu                                          | 1.0 M KOH                | ~79                                       | ~800                                                                      | 80                             | -0.6                                                                    | 212.49                                                                                                   | 7         |
| Cu-Ag                                          | 1.0 M KOH                | -                                         | -                                                                         | 79.2                           | -0.56                                                                   | ~26.4                                                                                                    | 8         |
| Ag <sub>2</sub> Cu <sub>2</sub> O <sub>3</sub> | 1.0 M CsHCO <sub>3</sub> | ~79                                       | ~155                                                                      | 91.7                           | -0.86                                                                   | 550                                                                                                      | 9         |

|                                                               |                         |              |      |      |       |      |    |
|---------------------------------------------------------------|-------------------------|--------------|------|------|-------|------|----|
| PTFE-Cu particles                                             | 1.0 M KOH               | ~72.5        | ~16  | 72.5 | -0.70 | ~16  | 10 |
| Polycrystalline Cu foil                                       | 0.1 M KOH               | ~39          | ~0.9 | ~57  | -0.6  | ~0.5 | 11 |
| Cu nanoparticles                                              | 10 M KOH                | ~15.9        | ~38  | 17.8 | -0.85 | 50.8 | 12 |
| Cu nanowire                                                   | 0.1 M KHCO <sub>3</sub> | ~12          | -    | 60   | -1.1  | -    | 13 |
| Cu single-atom/ Ti <sub>3</sub> C <sub>2</sub> T <sub>x</sub> | 1.0 M KOH               | 98 (-0.7 V)  | ~23  | 98   | -0.7  | 22.1 | 14 |
| Cu <sub>3</sub> Ag                                            | 1.0 M KOH               | ~30          | -    | ~60  | -1.1  | -    | 15 |
| Small Cu nanocube                                             | 0.5 M KHCO <sub>3</sub> | ~5           | <10  | ~40  | -1.49 | ~44  | 16 |
| Medium Cu nanocube                                            |                         | -            | -    | ~60  | -2.12 | ~240 |    |
| Large Cu nanocube                                             |                         | ~6           | <10  | ~65  | -1.88 | ~117 |    |
| Cu <sub>45.2</sub> /graphdiyne                                | 1.0 M KOH               | ~87 (-0.7 V) | ~156 | 91.2 | -0.8  | 312  | 17 |

## Reference

1. L. Wang, S. A. Nitopi, E. Bertheussen, M. Orazov, C. G. Morales-Guio, X. Liu, D. C. Higgins, K. Chan, J. K. Nørskov, C. Hahn and T. F. Jaramillo, *ACS Catal.*, 2018, **8**, 7445–7454.
2. Y. Pang, J. Li, Z. Wang, C. Tan, P. Hsieh, T. Zhuang, Z. Liang, C. Zou, X. Wang, P. D. Luna, J. P. Edwards, Y. Xu, F. Li, C. Dinh, M. Zhong, Y. Lou, D. Wu, L. Chen, E. H. Sargent and D. Sinton, *Nat. Catal.*, 2019, **2**, 251–258.
3. J. Li, K. Chang, H. Zhang, M. He, W. A. Goddard, J. Chen and Q. Lu, *ACS Catal.*, 2019, **9**, 4709–4718.
4. T. Zhuang, Y. Pang, Z. Liang, Z. Wang, Y. Li, C. Tan, J. Li, C. T. Dinh, P. D. Luna, P. Hsieh, T. Burdyny, H. Li, M. Liu, Y. Wang, F. Li, A. Proppe, A. Johnston, D. H. Nam, Z. Wu, Y. Zheng, A. H. Ip, H. Tan, L. Chen, S. Yu, S. O. Kelley, D. Sinton and E. H. Sargent, *Nat. Catal.*, 2018, **1**, 946–951.
5. W. Luc, X. Fu, J. Shi, J. Lv, M. Jouny, B. H. Ko, Y. Xu, Q. Tu, X. Hu, J. Wu, Q. Yue, Y. Liu, F. Jiao and Y. Kang, *Nat. Catal.*, 2019, **2**, 423–430.
6. D. Raciti, L. Cao, K. J. Livi, P. F. Rottmann, X. Tang, C. Li, Z. Hicks, K. H. Bowen, K. J. Hemker, T. Mueller and C. Wang, *ACS Catal.*, 2017, **7**, 4467–4472.
7. M. Jouny, W. Luc and F. Jiao, *Nat. Catal.*, 2018, **1**, 748–755
8. X. Wang, Z. Wang, T. Zhuang, C. T. Dinh, J. Li, D. H. Nam, F. Li, C. Huang, C. Tan, Z. Chen, M. Chi, C. M. Gabardo, A. Seifitokaldani, P. Todorović, A. Proppe, Y. Pang, A. R. Kirmani, Y. Wang, A. H. Ip, L. J. Richter, B. Scheffel, A. Xu, S. Lo, S. O. Kelley, D. Sinton and E. H. Sargent, *Nat. Commun.*, 2019, **10**, 5186.
9. N. Martić, C. Reller, C. Macauley, M. Löffler, A. M. Reichert, T. Reichbauer, K. M. Vetter, B. Schmid, D. McLaughli, P. Leidinger, D. Reinisch, C. Vogl, K. J. J.

- Mayrhofer, I. Katsounaros and G. Schmid, *Energy Environ. Sci.*, 2020, **13**, 2993–3006.
10. R. Chen, H. Su, D. Liu, R. Huang, X. Meng, X. Cui, Z. Tian, D. Zhang and D. Deng. *Angew. Chem.*, 2020, **132**, 160-166.
11. A. S. Malkani, J. Li, N. J. Oliveira<sup>1</sup>, M. He, X. Chang, B. Xu and Q. Lu, *Sci. Adv.*, 2020, **6**, 2569.
12. L. Han, W. Zhou and C. Xiang, *ACS Energy Lett.*, 2018, **3**, 855-860.
13. H. Zhang, Y. Zhang, Y. Li, S. Ahn, G. T. R. Palmore, J. Fu, A. A. Peterson and S. Sun, *Nanoscale*, 2019, **11**, 12075.
14. H. Bao, Y. Qiu, X. Peng, J. Wang, Y. Mi, S. Zhao, X. Liu, Y. Liu, R. Cao, L. Zhuo, J. Ren, J. Sun, J. Luo and X. Sun, *Nat. Commun.*, 2021, **12**, 238.
15. A. Guan, Q. Wang, aY. Ji, S. Li, C. Yang, L. Qian, L. Zhang, L. Wu and G. Zheng, *J. Mater. Chem. A*, 2021, **9**, 21779.
16. P. Zhu, C. Xia, C. Liu, K. Jiang, G. Gao, X. Zhang, Y. Xia, Y. Lei, H. N. Alshareef, T. P. Senftle and H. Wang, *Proc. Natl Acad. Sci.*, 2021, **118**, 2010868118.
17. W. Rong, H. Zou, W. Zang, S.o Xi, S. Wei, B. Long, J. Hu, Y. Ji and L. Duan, *Angew.Chem. Int. Ed.*, 2021, **60**, 466-472.
